# Supplementary material for: Graphene-nanoscroll-based Integrated and self-standing electrode with a sandwich structure for lithium sulfur batteries
Source: Royal Society of Chemistry journal article supplement (doi:10.1039/c9qi01344j), 2019-11-18
Supplement: c9qi01344j1.pdf [file c9qi01344j1.pdf]

## Electronic Supporting Information

### **Graphene Nanoscroll-based Integrated and Self-standing electrode with a Sandwich Structure for Lithium Sulfur Battery**

*Yi Guo,<sup>a</sup> Yin Zhang,<sup>b</sup> Yali Sun,<sup>a</sup> Yun Zhang<sup>\*,b</sup> and Hao Wu<sup>\*,b</sup>*

<sup>a</sup> College of Materials Science and Engineering, Sichuan University of Science & Engineering, Zigong, 643000, P. R. China.

<sup>b</sup> Department of Advanced Energy Materials, College of Materials Science and Engineering, Sichuan University, Chengdu, 610064, P. R. China.

\*Corresponding authors. E-mail address: y\_zhang@scu.edu.cn; hao.wu@scu.edu.cn

#### **Contents**

**Page 1: Experimental section**

**Page 4: Figure S1** (a) TGA curves of Sand-GM/S electrodes, (b) XRD patterns of Sand-GM/S electrodes and pure GNS

**Page 5: Figure S2** Cycling performance of Sand-G/S electrode at 0.5C

**Page 6: Figure S3** (a-b) CV and EIS cruves of Sand-GM/S electrodes

**Page 7: Figure S4** S mapping images of two sides of cycled Sand-GM/S electrode

**Page 8: Figure S5** S2p spectra of Li<sub>2</sub>S<sub>n</sub> (4≤n≤8)

**Page 9: References**

## **Experimental section**

### **Materials:**

In this work, graphene oxides (GO) are purchased from Tanfeng Tech. Inc (Suzhou, China). Other reagents are analytical grade without further purification and purchased from Chengdu Kelong Chemical Reagents Corporation.

### **Synthesis of integrated cathodes**

GNS and MnO<sub>2</sub> nanowires are synthesized in the same way to our previous work.<sup>1</sup> And then, the composite of sulfur and GNS (S@GNS) is prepared according to the approach reported elsewhere.<sup>2</sup> Typically, 10 mg GNS are uniformly dispersed in 140 mL deionized (DI) water, followed ultrasonically treatment. Meanwhile, 80 mg sublimed sulphur are uniformly dispersed in 5 mL ethylene diamine (EDA). After mixing the above two solution together, 0.1 M hydrochloric acid solution is added into the mixture, accompanying with stirring for 5 min. Finally, a grey residue is harvested after centrifugal washing, and denoted as S@GNS. Through changing the mass of the sublimed sulfur, a series of S@GNS composites with different sulfur content can be easily obtained.

9 mg GNS and 3mg MnO<sub>2</sub> nanowires are dispersed into ethanol solution, respectively. And then, MnO<sub>2</sub> dispersion is added into the GNS solution slowly under ultrasonic process and continuous stirring to form GNS/MnO<sub>2</sub> dispersion. Meanwhile, the S@GNS dispersion is obtained by adding the as-prepared S@GNS into the mixture solution of ethanol and deionized water (v/v, 1:4). Finally, the GNS/MnO<sub>2</sub> dispersion, S@GNS dispersion and GNS/MnO<sub>2</sub> dispersion are filtrated layer by layer to form a sandwich-like membrane (Sand-GM/S-m). The as-obtained Sand-GM/S-m has a diameter of 40 mm, and the mass loading of GNS/MnO<sub>2</sub> (per layer) is about 0.96 mg cm<sup>-2</sup>. By punching the as-prepared Sand-GM/S-m to small wafers with the diameters of 12 mm, the electrode denoted as Sand-GM/S can be obtained. A kind of all GNS supported sandwich-like electrode is also prepared by removing the MnO<sub>2</sub> nanowires in the Sand-GM/S electrode, which is marked as Sand-G/S.

**Adsorption test:**

Stoichiometric amounts of sulfur and  $\text{Li}_2\text{S}$  are dissolved into 1,2-dimethoxyethane (DME) and 1,3-dioxolane (DOL) mixed solution (v/v, 1:1) to prepare  $\text{Li}_2\text{S}_n$  ( $4 \leq n \leq 8$ ) solution. To prepare a typical 5 mM  $\text{Li}_2\text{S}_n$  ( $4 \leq n \leq 8$ ) solution, sulfur (16.8 mg) and  $\text{Li}_2\text{S}$  (3.4 mg) are dissolved in DME/DOL mixed solution (15 mL; v/v, 1:1). Then the mixed solution is magnetically stirred and heated at 55 °C overnight in an Ar-filled glove box to yield the red-brown  $\text{Li}_2\text{S}_n$  ( $4 \leq n \leq 8$ ) solution.

GNS and GNS/ $\text{MnO}_2$  films (GNS-m and GNSM-m) have been prepared through the same vacuum filtrating method. To evaluate the adsorption ability of GNS and GNS/ $\text{MnO}_2$  hybrid toward soluble polysulfides visually, GNS-m and GNSM-m with same mass (5mg) are immersed in the as-obtained  $\text{Li}_2\text{S}_n$  ( $4 \leq n \leq 8$ ) solution (3mL) overnight.

**Materials characterization:**

The content of sulfur in composite materials are measured by thermogravimetric analysis (TGA) using a simultaneous TGA/DSC-2 instrument (METTLERLEDO, USA) under nitrogen atmosphere with a heating rate of 10 °C  $\text{min}^{-1}$  from room temperature to 600 °C. The crystalline structure of material is detected by an X-ray diffraction (XRD) using a Bruker DX-1000 diffractometer (Cu  $\text{K}\alpha$  radiation) in the range of 10° to 80° at a scan rate of 0.06°  $\text{s}^{-1}$ . Morphologies of as-prepared materials are characterized by field-emission scanning electron microscopy (FESEM, Hitachi S-4800) equipped with an energy-dispersive X-ray spectroscopy (EDS; Oxford XMax) system. X-ray photoelectron spectroscopy (XPS, AXIS Ultra DLD, Kratos) analysis is performed to identify the chemical element composition on the surface of materials.  $\text{Li}_2\text{S}_n$  ( $4 \leq n \leq 8$ ) solution recollected from adsorption test are examined by UV-visible absorption spectrophotometry (UV-vis, Shimadzu UV3600).

**Electrochemical performance measurements:**

For the electrochemical performance tests, CR2032 coin-type cells are assembled in an Ar-filled glove box directly using the Sand-G/S and Sand-GM/S as cathode, lithium foil as anode, and Celgard 2400 as separator. The electrolyte is 1.0 M lithium bis(trifluoromethanesulfonyl)imide (LiTFSI, 99.95%, Aldrich) dissolved in

1,3-dioxolane (DOL) and 1,2-dimethoxyethane (DME) (1:1, v/v) with 0.1 M LiNO<sub>3</sub> electrolyte additive. The amount of electrolyte added in one cell follows these rules: If the mass of sulfur below 0.001 g, the amount of electrolyte in one cell is about 0.040 mL g<sup>-1</sup> S. When the mass of sulfur is more than 0.001 g, for every 1.000 g of sulfur, the amount of electrolyte is increased by 0.020 mL. Galvanostatic charge/discharge measurements are performed on a cell test instrument (Neware BTS-610 battery tester, China). During electrochemical performance testing, both the current rate set and the specific capacity are referred to the mass of sulfur in the cathode (1 C = 1675 mAh g<sup>-1</sup>). Cyclic voltammetry (CV) measurements and electrochemical impedance spectroscopy (EIS) testing are performed using a PARSTAT multichannel electrochemical workstation (Princeton Applied Research, USA). The scan rate and voltage range of CV are 0.1 mV s<sup>-1</sup> and 1.5-2.8 V, respectively. For the EIS testing, the frequency range is 100 kHz to 10 mHz, and the AC voltage amplitude is 5 mV. All the electrochemical tests are performed at ambient temperature

## Supporting figures

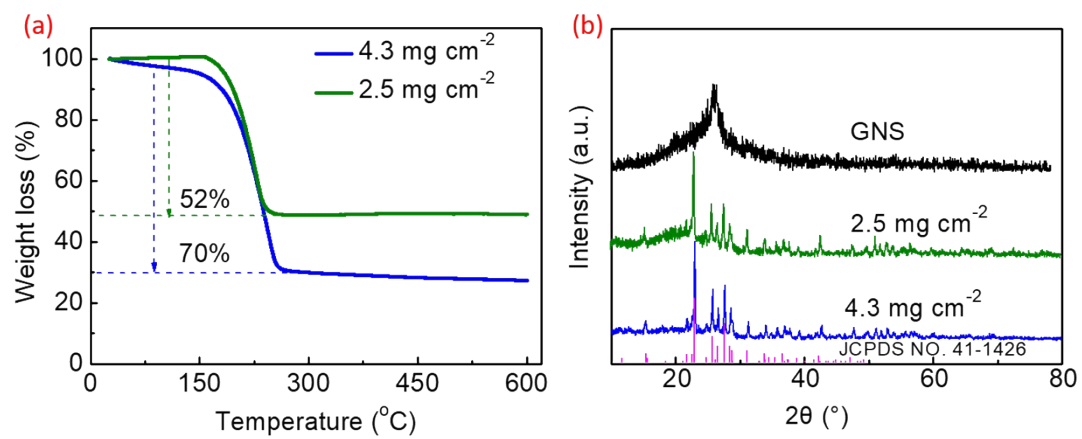

**Figure S1** (a) TGA curves of Sand-GM/S electrodes, (b) XRD patterns of Sand-GM/S electrodes and pure GNS

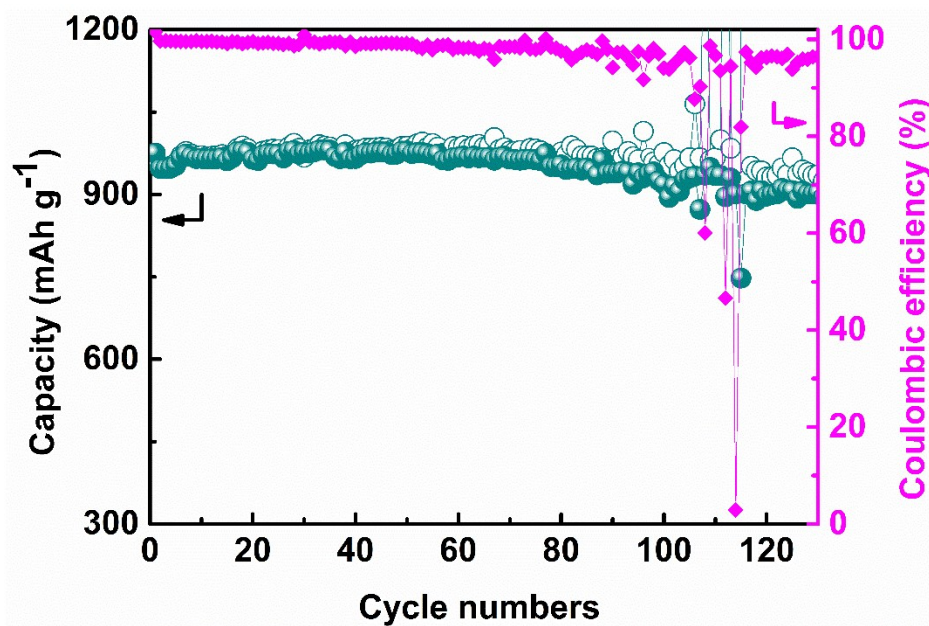

Figure S2 Cycling performance of Sand-G/S electrode at 0.5C

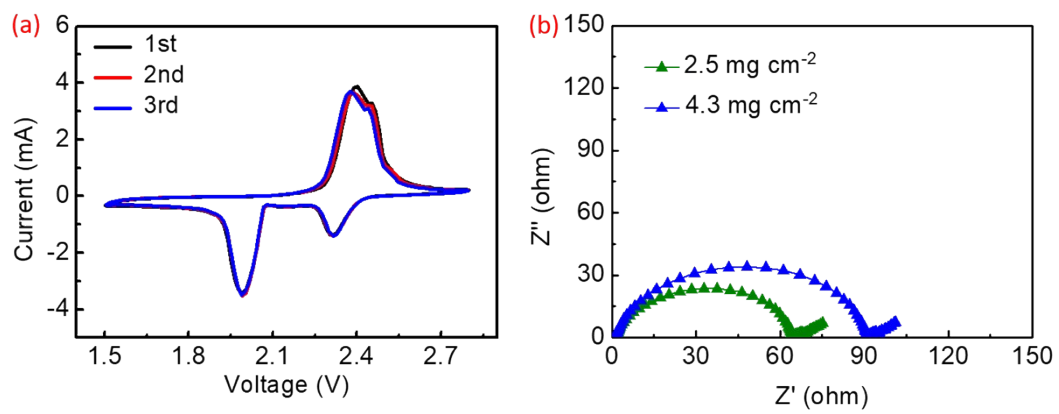

**Figure S3** (a-b) CV and EIS cruves of Sand-GM/S electrodes

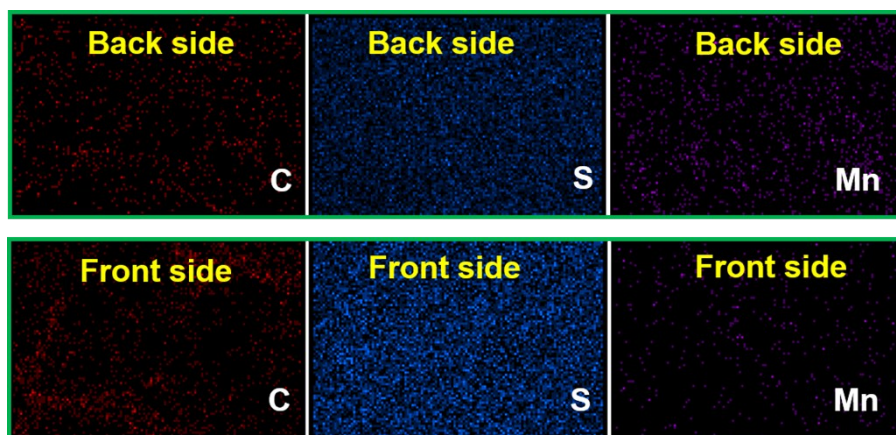

**Figure S4** S mapping images of two sides of cycled Sand-GM/S electrode



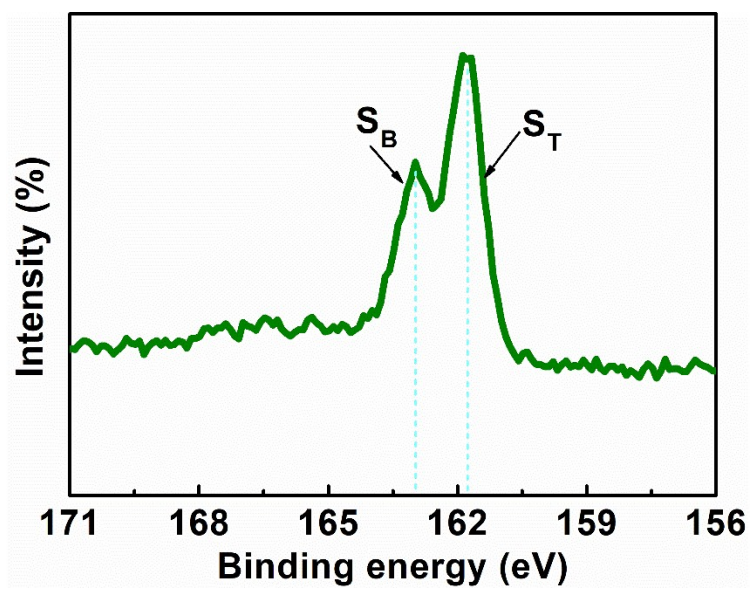

Figure S5 S2p spectra of  $\text{Li}_2\text{S}_n$  ( $4 \leq n \leq 8$ )

## References

1. Y. Guo, Y. Zhang, Y. Zhang, M. Xiang, H. Wu, H. Liu and S. Dou, *J. Mater. Chem. A*, 2018, **6**, 19358-19370.
2. C. Wang, H. Chen, W. Dong, J. Ge, W. Lu, X. Wu, L. Guo and L. Chen, *Chem. Commun.*, 2014, **50**, 1202–1204.
